# Supplementary material
Source: Research Square preprint supplement (doi:10.21203/rs.3.rs-9456371/v1)
Supplement: Supplementary file 1 [file 5f987c77ac86199435bc9d9b.docx]

| **Supplementary Table 1.** Fertilizer costs (Rs. ha⁻¹) under different nutrient management treatments during the two-year experimental period. | | | | |
| --- | --- | --- | --- | --- |
| **Treatment** | **RDF level (NPK + FYM)** | **Macronutrient cost (NPK + FYM) (Rs. ha⁻¹)** | **Micronutrient cost (Rs. ha⁻¹)** | **Total fertilizer cost (Rs. ha⁻¹)** |
| T1 | 100% | 92,424 | 0 | 92,424 |
| T2 | 75% | 69,318 | 171,815 | 241,133 |
| T3 | 50% | 46,212 | 171,815 | 218,027 |
| T4 | 25% | 23,106 | 171,815 | 194,921 |
| T5 | 75% | 69,318 | 207,948 | 277,266 |
| T6 | 50% | 46,212 | 207,948 | 254,160 |
| T7 | 25% | 23,106 | 207,948 | 231,054 |
| T8 | 75% | 69,318 | 72,267 | 141,585 |
| T9 | 50% | 46,212 | 72,267 | 118,479 |
| T10 | 25% | 23,106 | 72,267 | 95,373 |

| **Supplementary Table 2a.** Fixed operational costs incurred per hectare in the mango orchard during the two-year experimental period | | | |
| --- | --- | --- | --- |
| **Sl. No.** | **Operation/Practice** | | **Cost (Rs. ha⁻¹)** |
| 1 | Harrowing (3 times annually @ 2 h/harrowing, i.e., 6 h @ Rs. 1,000 h⁻¹) | | 6,000 |
| 2 | Cleaning, hoeing of basins, and bund making (6 laborers @ Rs. 500 labourers¹) | | 3,000 |
| 3 | Fertilizer and FYM application (7 laborers @ Rs. 500 labourers¹) | | 3,500 |
| 4 | Irrigation (2 irrigations @ Rs. 2,500 irrigations⁻¹ including labor) | | 5,000 |
| 5 | Insecticide and pesticide sprays (3 sprays, including labor: mango hopper, mealybug, powdery mildew) | | 12,500 |
| **Total** | **Fixed operational costs** | | **30,000** |
| **Supplementary Table 2b.** Gross Income per hectare in the mango orchard during the two-year experimental period | | | |
| **Treatments** | **Yield (t/ha)** | **Rate (Rs. /kg)** | **Gross Income (Rs. /ha)** |
| T1 | 17.39 | 20.00 | 347702.72 |
| T2 | 20.57 | 25.00 | 514219.62 |
| T3 | 17.75 | 25.00 | 443648.17 |
| T4 | 16.28 | 20.00 | 325615.67 |
| T5 | 21.81 | 30.00 | 654334.10 |
| T6 | 19.60 | 25.00 | 489923.18 |
| T7 | 17.17 | 20.00 | 343355.88 |
| T8 | 22.68 | 30.00 | 680464.18 |
| T9 | 18.66 | 30.00 | 559897.96 |
| T10 | 16.60 | 20.00 | 331946.01 |

| **Supplementary Table S3.** Settings – PLS-SEM algorithm | |
| --- | --- |
| **Parameter** | **Setting** |
| Max. number of iterations | 3000 |
| Stop criterion | 10⁻⁷ |
| Use Lohmoeller settings? | No |
| Initial weights | 1.0 |
| Weighting scheme | Path |
| Type of results | Standardized |
| Vary copula by binary categories | Yes |

| **Supplementary Table S4.** Settings – Bootstrapping | |
| --- | --- |
| **Parameter** | **Setting** |
| Complexity | Most important (faster) |
| Save results per sample | No |
| Confidence interval method | Percentile bootstrap |
| Parallel processing | Yes |
| Significance level | 0.05 |
| Test type | Two tailed |
| Samples | 5000 |
| Seed | Fixed seed |

| **Supplementary Table S5.** Total indirect effects – Mean, STDEV, T values, p values | | | | | |
| --- | --- | --- | --- | --- | --- |
| **Total indirect path** | **Original sample (O)** | **Sample mean (M)** | **Standard deviation (STDEV)** | **T statistics** | **P values** |
| B:C Ratio → Net Income | -0.742 | -0.884 | 2.157 | 0.344 | 0.731 |
| B:C Ratio → RDF Level | -1.807 | -0.508 | 2.188 | 0.826 | 0.409 |
| GC (B:C Ratio → RDF Level) | 0.144 | 0.370 | 1.026 | 0.140 | 0.888 |
| GC (B:C Ratio → Yield) → Net | 0.774 | 0.773 | 1.880 | 0.412 | 0.680 |
| GC (B:C Ratio → Yield) → RDF | 2.069 | 0.592 | 2.426 | 0.853 | 0.394 |
| GC (Yield → RDF Level) → Net | 0.363 | 0.201 | 0.861 | 0.421 | 0.673 |
| QE (B:C Ratio) → Net Income | 0.070 | 0.127 | 0.663 | 0.105 | 0.917 |
| QE (B:C Ratio) → RDF Level | 0.462 | 0.116 | 0.542 | 0.852 | 0.394 |
| QE (Yield) → Net Income | -0.006 | -0.067 | 0.233 | 0.028 | 0.978 |
| Yield → Net Income | -0.192 | -0.017 | 0.673 | 0.285 | 0.776 |

| **Supplementary Table S6.** Total indirect effects – Confidence intervals (percentile bootstrap) | | | |
| --- | --- | --- | --- |
| **Total indirect path** | **Original sample (O)** | **2.5%** | **97.5%** |
| B:C Ratio → Net Income | -0.742 | -5.425 | 2.804 |
| B:C Ratio → RDF Level | -1.807 | -5.791 | 3.792 |
| GC (B:C Ratio → RDF Level) → ... | 0.144 | -1.304 | 2.777 |
| GC (B:C Ratio → Yield) → Net I... | 0.774 | -3.106 | 4.330 |
| GC (B:C Ratio → Yield) → RDF ... | 2.069 | -4.109 | 6.174 |
| GC (Yield → RDF Level) → Net ... | 0.363 | -1.402 | 1.924 |
| QE (B:C Ratio) → Net Income | 0.070 | -1.132 | 1.496 |
| QE (B:C Ratio) → RDF Level | 0.462 | -0.996 | 1.334 |
| QE (Yield) → Net Income | -0.006 | -0.568 | 0.317 |
| Yield → Net Income | -0.192 | -1.403 | 1.366 |

| **Supplementary Table S7.** Specific indirect effects – Mean, STDEV, T values, p values | | | | | |
| --- | --- | --- | --- | --- | --- |
| **Specific indirect path** | **Original sample (O)** | **Sample mean (M)** | **Standard deviation (STDEV)** | **T statistics** | **P values** |
| Yield → RDF Level → Net Income | -0.192 | -0.017 | 0.673 | 0.285 | 0.776 |
| QE (Yield) → RDF Level → Net Income | -0.006 | -0.067 | 0.233 | 0.028 | 0.978 |
| QE (B:C Ratio) → Yield → Net Income | 0.286 | 0.189 | 0.173 | 1.652 | 0.099 |
| QE (B:C Ratio) → RDF Level → Net Income | -0.103 | -0.059 | 0.377 | 0.274 | 0.784 |
| QE (B:C Ratio) → Yield → RDF Level | 0.462 | 0.116 | 0.542 | 0.852 | 0.394 |
| GC (Yield → RDF Level) → RDF Level → Net Income | 0.363 | 0.201 | 0.861 | 0.421 | 0.673 |
| GC (B:C Ratio → Yield) → Yield → Net Income | 1.282 | 0.863 | 0.728 | 1.761 | 0.078 |
| GC (B:C Ratio → Yield) → Yield → RDF Level → Net Income | 2.069 | 0.592 | 2.426 | 0.853 | 0.394 |
| GC (B:C Ratio → Yield) → Yield → RDF Level → Net Income | -0.507 | -0.090 | 1.645 | 0.308 | 0.758 |
| GC (B:C Ratio → RDF Level) → RDF Level → Net Income | 0.144 | 0.370 | 1.026 | 0.140 | 0.888 |
| B:C Ratio → Yield → RDF Level → Net Income | 0.443 | 0.077 | 1.469 | 0.302 | 0.763 |
| QE (B:C Ratio) → Yield → RDF Level → Net Income | -0.113 | -0.003 | 0.307 | 0.368 | 0.713 |
| B:C Ratio → Yield → Net Income | -1.119 | -0.711 | 0.701 | 1.597 | 0.110 |
| B:C Ratio → RDF Level → Net Income | -0.065 | -0.250 | 0.933 | 0.070 | 0.944 |
| B:C Ratio → Yield → RDF Level | -1.807 | -0.508 | 2.188 | 0.826 | 0.409 |

| **Supplementary Table S8.** Specific indirect effects – Confidence intervals bias corrected | | | | | |
| --- | --- | --- | --- | --- | --- |
| **Specific indirect path** | **Original sample (O)** | **Sample mean (M)** | **Bias** | **2.5%** | **97.5%** |
| Yield → RDF Level → Net Income | -0.192 | -0.017 | 0.175 | -3.725 | 0.295 |
| QE (Yield) → RDF Level → Net Income | -0.006 | -0.067 | -0.061 | -0.342 | 0.599 |
| QE (B:C Ratio) → Yield → Net Income | 0.286 | 0.189 | -0.097 | 0.078 | 0.922 |
| QE (B:C Ratio) → RDF Level → Net Income | -0.103 | -0.059 | 0.044 | -1.423 | 0.351 |
| QE (B:C Ratio) → Yield → RDF Level | 0.462 | 0.116 | -0.346 | 0.031 | 3.735 |
| GC (Yield → RDF Level) → RDF Level → Net Income | 0.363 | 0.201 | -0.162 | -0.400 | 4.096 |
| GC (B:C Ratio → Yield) → Yield → Net Income | 1.282 | 0.863 | -0.419 | 0.483 | 4.535 |
| GC (B:C Ratio → Yield) → Yield → RDF Level | 2.069 | 0.592 | -1.477 | -0.014 | 14.672 |
| GC (B:C Ratio → Yield) → Yield → RDF Level → Net Income | -0.507 | -0.090 | 0.417 | -17.643 | 0.199 |
| GC (B:C Ratio → RDF Level) → RDF Level → Net Income | 0.144 | 0.370 | 0.226 | -0.918 | 2.962 |
| B:C Ratio → Yield → RDF Level → Net Income | 0.443 | 0.077 | -0.366 | -0.097 | 11.707 |
| QE (B:C Ratio) → Yield → RDF Level → Net Income | -0.113 | -0.003 | 0.110 | -4.561 | 0.018 |
| B:C Ratio → Yield → Net Income | -1.119 | -0.711 | 0.409 | -4.440 | -0.336 |
| B:C Ratio → RDF Level → Net Income | -0.065 | -0.250 | -0.185 | -2.404 | 1.163 |
| B:C Ratio → Yield → RDF Level | -1.807 | -0.508 | 1.298 | -14.752 | -0.034 |
