# Supplementary material
Source: Research Square preprint supplement (doi:10.21203/rs.3.rs-9456371/v1)

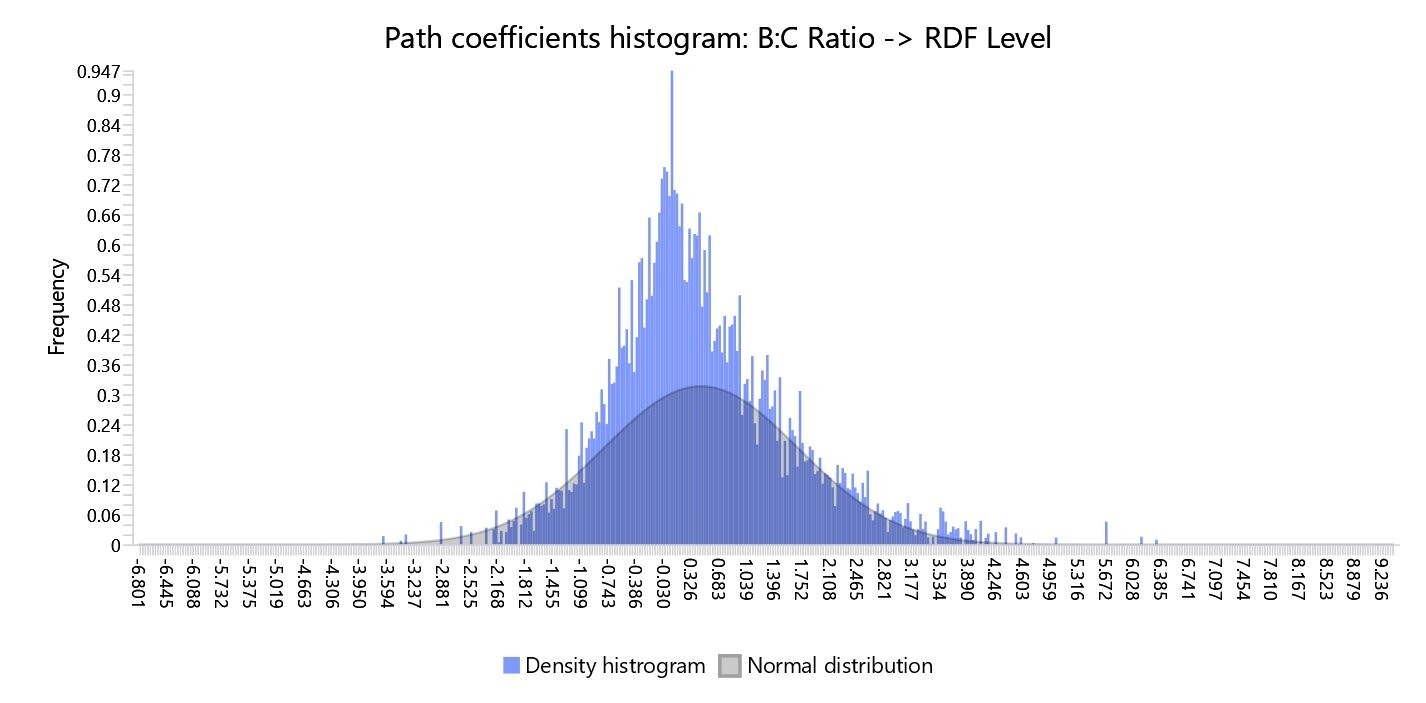


**Supplementary Fig. S1:** Path coefficients histogram: B:C Ratio → RDF Level


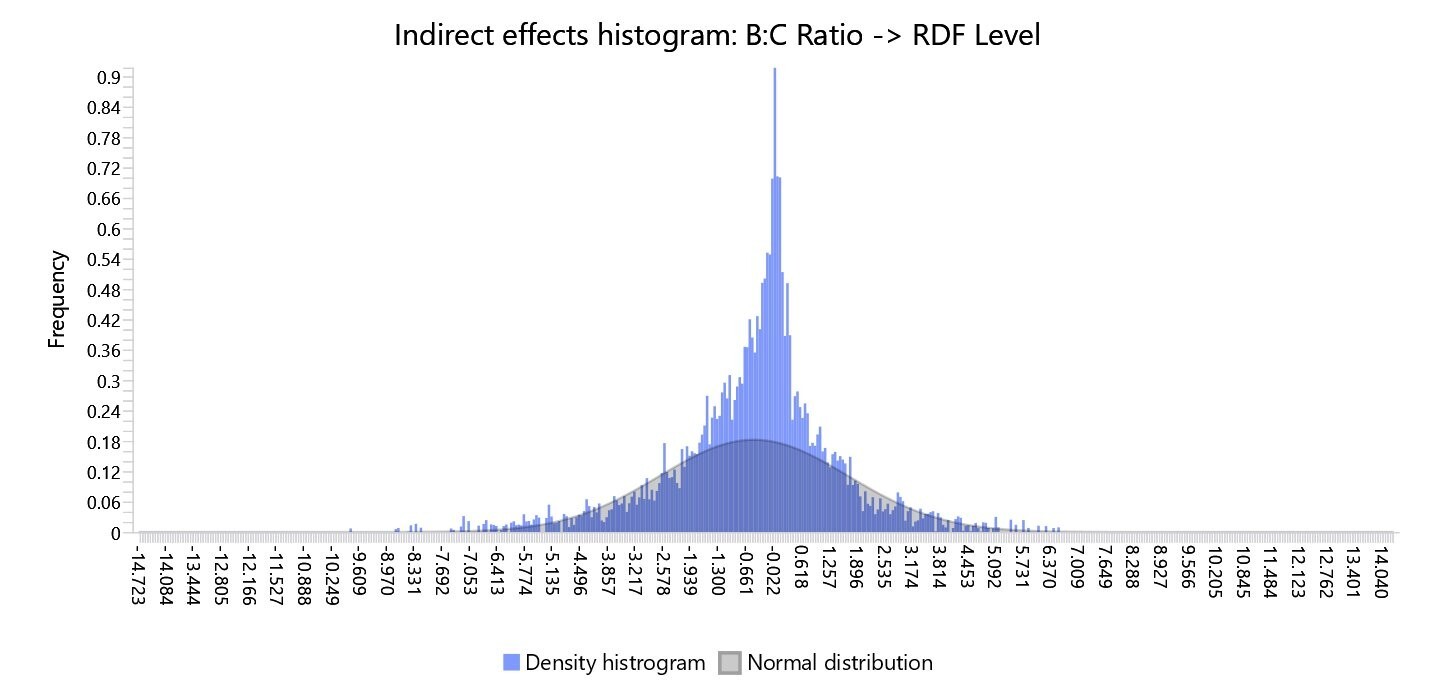


**Supplementary Fig. S2:** Indirect effects histogram: B:C Ratio → RDF Level

**Supplementary Fig. S3:** Total effects histogram: B:C Ratio → RDF Level


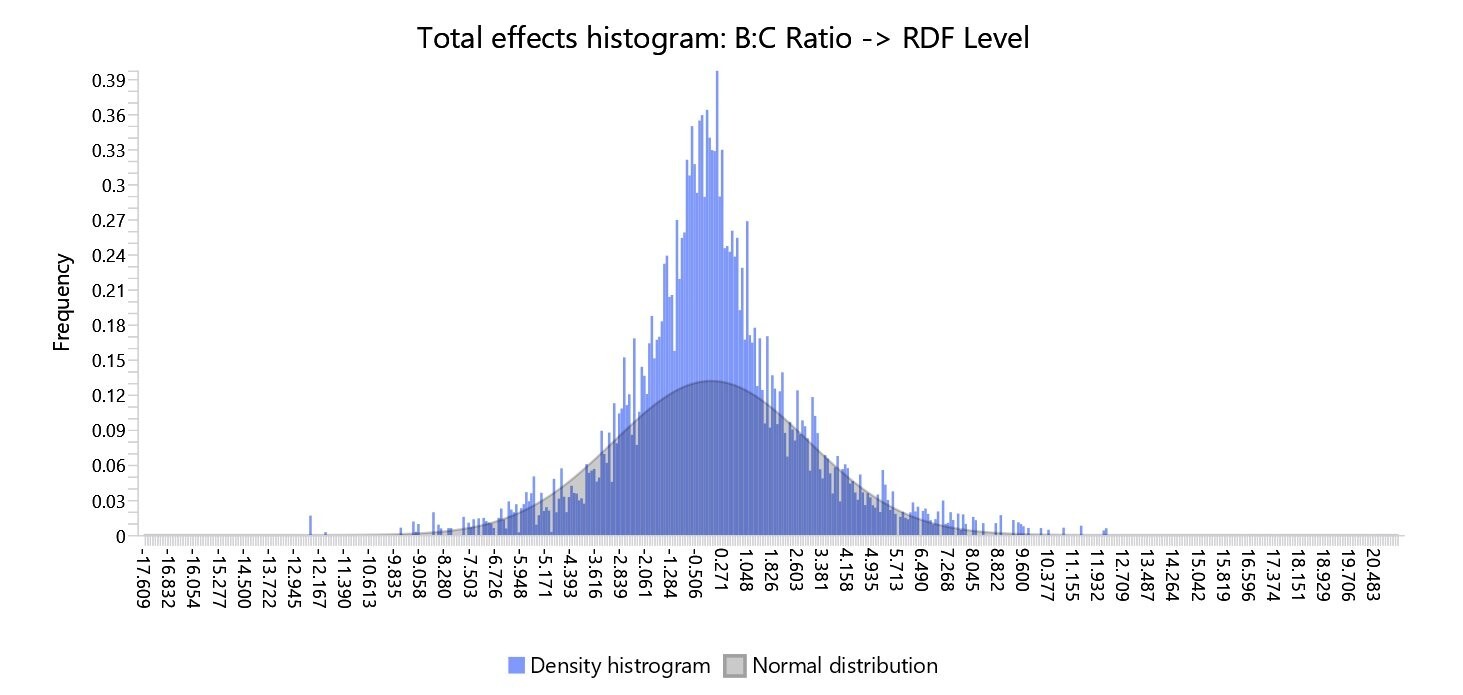

Supplement: Supplementary file 2 [file cd07202505b1afd4d84e8457.docx]
